# Supplementary material
Source: publisher site journal article supplement (http://www.spandidos-publications.com/6228/downloadSupplementary)
Supplement: Supplementary file 1 [file downloadSupplementary]

## Sheet: genemania-network1
Table SIII. Interaction loci of candidate genes
Entity 1	Entity 2	Weight	Network group	Network
TMED5	SMC5	0.0120934	Co-expression	Wu-Garvey-2007
AP1S2	PPP1CB	0.0186854	Co-expression	Wu-Garvey-2007
EIF1AX	AP1S2	0.0217485	Co-expression	Wu-Garvey-2007
GABPA	ZBTB6	0.0115375	Co-expression	Wu-Garvey-2007
GABPA	CLEC2B	0.0105056	Co-expression	Wu-Garvey-2007
ADM	ALPL	0.00614198	Co-expression	Wu-Garvey-2007
NEK7	PSIP1	0.00875213	Co-expression	Wu-Garvey-2007
NEK7	TMED5	0.00489027	Co-expression	Wu-Garvey-2007
NEK7	ZNF117	0.00742616	Co-expression	Wu-Garvey-2007
NEK7	AP1S2	0.00723638	Co-expression	Wu-Garvey-2007
NEK7	EIF1AX	0.00770438	Co-expression	Wu-Garvey-2007
TMX1	ZBTB6	0.00872354	Co-expression	Wu-Garvey-2007
TMX1	CLEC2B	0.00813225	Co-expression	Wu-Garvey-2007
TMX1	GABPA	0.00450127	Co-expression	Wu-Garvey-2007
TMEM123	PSIP1	0.0107372	Co-expression	Wu-Garvey-2007
TMEM123	NEK7	0.00287987	Co-expression	Wu-Garvey-2007
PNISR	SMC5	0.00567681	Co-expression	Wu-Garvey-2007
PNISR	PSIP1	0.00728525	Co-expression	Wu-Garvey-2007
PNISR	ZNF117	0.00615171	Co-expression	Wu-Garvey-2007
PNISR	NEK7	0.00220905	Co-expression	Wu-Garvey-2007
U2SURP	TMEM123	0.00600043	Co-expression	Wu-Garvey-2007
U2SURP	PNISR	0.00406001	Co-expression	Wu-Garvey-2007
PPP1R12A	SMC5	0.00777576	Co-expression	Wu-Garvey-2007
PPP1R12A	ZBTB6	0.00841144	Co-expression	Wu-Garvey-2007
PPP1R12A	PNISR	0.00250215	Co-expression	Wu-Garvey-2007
PPP1R12A	U2SURP	0.0056273	Co-expression	Wu-Garvey-2007
PPP1R12A	NUCB2	0.0054178	Co-expression	Wu-Garvey-2007
CD164	SMC5	0.00752521	Co-expression	Wu-Garvey-2007
CD164	TMED5	0.00546326	Co-expression	Wu-Garvey-2007
CD164	PPP1CB	0.00700529	Co-expression	Wu-Garvey-2007
CD164	AP1S2	0.00808156	Co-expression	Wu-Garvey-2007
CD164	NEK7	0.00294626	Co-expression	Wu-Garvey-2007
CD164	PNISR	0.00247788	Co-expression	Wu-Garvey-2007
SRSF11	SMC5	0.00814173	Co-expression	Wu-Garvey-2007
SRSF11	EIF1AX	0.00914566	Co-expression	Wu-Garvey-2007
SRSF11	NEK7	0.00329906	Co-expression	Wu-Garvey-2007
SRSF11	TMEM123	0.00355663	Co-expression	Wu-Garvey-2007
SRSF11	PNISR	0.00266952	Co-expression	Wu-Garvey-2007
SRSF11	PPP1R12A	0.00351967	Co-expression	Wu-Garvey-2007
TOP2B	NEK7	0.0084799	Co-expression	Wu-Garvey-2007
TOP2B	PNISR	0.00727892	Co-expression	Wu-Garvey-2007
TOP2B	PPP1R12A	0.0102205	Co-expression	Wu-Garvey-2007
WASHC4	NEK7	0.00881337	Co-expression	Wu-Garvey-2007
WASHC4	PNISR	0.00737418	Co-expression	Wu-Garvey-2007
WASHC4	PPP1R12A	0.00998436	Co-expression	Wu-Garvey-2007
WASHC4	CD164	0.00960289	Co-expression	Wu-Garvey-2007
WASHC4	SRSF11	0.010653	Co-expression	Wu-Garvey-2007
ARL1	CLEC2B	0.0205448	Co-expression	Wu-Garvey-2007
ARL1	TMX1	0.0067246	Co-expression	Wu-Garvey-2007
LYSMD3	LIN7C	0.0152755	Co-expression	Arijs-Rutgeerts-2009
OTUD6B	AEBP2	0.0106201	Co-expression	Arijs-Rutgeerts-2009
OTUD6B	ZBTB41	0.00648664	Co-expression	Arijs-Rutgeerts-2009
OTUD6B	TRMT13	0.00683164	Co-expression	Arijs-Rutgeerts-2009
TWF1	SAMD9	0.0104211	Co-expression	Arijs-Rutgeerts-2009
EIF1AX	OTUD6B	0.00882568	Co-expression	Arijs-Rutgeerts-2009
ZBTB6	ZNF92	0.0191163	Co-expression	Arijs-Rutgeerts-2009
GABPA	LIN7C	0.0121603	Co-expression	Arijs-Rutgeerts-2009
GABPA	ZNF92	0.0223598	Co-expression	Arijs-Rutgeerts-2009
GABPA	ZBTB6	0.015957	Co-expression	Arijs-Rutgeerts-2009
ADM	SAMD9	0.00386585	Co-expression	Arijs-Rutgeerts-2009
NEK7	GABPA	0.00805553	Co-expression	Arijs-Rutgeerts-2009
TMX1	TMED5	0.0173449	Co-expression	Arijs-Rutgeerts-2009
TMEM123	AEBP2	0.00810772	Co-expression	Arijs-Rutgeerts-2009
TMEM123	ZBTB41	0.00416611	Co-expression	Arijs-Rutgeerts-2009
TMEM123	OTUD6B	0.00297875	Co-expression	Arijs-Rutgeerts-2009
PNISR	TRMT13	0.00925452	Co-expression	Arijs-Rutgeerts-2009
PRKACB	ZRANB2	0.00571738	Co-expression	Arijs-Rutgeerts-2009
PRKACB	PPP1CB	0.00689235	Co-expression	Arijs-Rutgeerts-2009
PRKACB	GMFB	0.00622089	Co-expression	Arijs-Rutgeerts-2009
U2SURP	TRMT13	0.0247469	Co-expression	Arijs-Rutgeerts-2009
U2SURP	OTUD6B	0.00833871	Co-expression	Arijs-Rutgeerts-2009
SRSF11	TRMT13	0.0250894	Co-expression	Arijs-Rutgeerts-2009
SRSF11	OTUD6B	0.00863308	Co-expression	Arijs-Rutgeerts-2009
SRSF11	PNISR	0.0104758	Co-expression	Arijs-Rutgeerts-2009
ARMT1	COMMD8	0.0166143	Co-expression	Arijs-Rutgeerts-2009
ARMT1	TWF1	0.0168162	Co-expression	Arijs-Rutgeerts-2009
LYSMD2	C21orf91	0.0344271	Co-expression	Arijs-Rutgeerts-2009
TOP2B	AEBP2	0.00740088	Co-expression	Arijs-Rutgeerts-2009
TOP2B	ZBTB41	0.00450281	Co-expression	Arijs-Rutgeerts-2009
TOP2B	ZNF92	0.00774582	Co-expression	Arijs-Rutgeerts-2009
TOP2B	TRMT13	0.00568993	Co-expression	Arijs-Rutgeerts-2009
TOP2B	OTUD6B	0.00360779	Co-expression	Arijs-Rutgeerts-2009
TOP2B	EIF1AX	0.0078477	Co-expression	Arijs-Rutgeerts-2009
TOP2B	TMEM123	0.00267817	Co-expression	Arijs-Rutgeerts-2009
TOP2B	U2SURP	0.00667197	Co-expression	Arijs-Rutgeerts-2009
TOP2B	SRSF11	0.00613065	Co-expression	Arijs-Rutgeerts-2009
ARL1	NUCB2	0.0138372	Co-expression	Arijs-Rutgeerts-2009
SH2D1A	TRAT1	0.0226706	Co-expression	Arijs-Rutgeerts-2009
LIN7C	TMED7	0.0197674	Co-expression	Innocenti-Brown-2011
KLRC4	KLRF1	0.0268885	Co-expression	Innocenti-Brown-2011
MYBL1	KLRF1	0.0214676	Co-expression	Innocenti-Brown-2011
MYBL1	KLRC4	0.0188481	Co-expression	Innocenti-Brown-2011
TMED5	TMED7	0.0194007	Co-expression	Innocenti-Brown-2011
ZNF117	ZNF92	0.0110327	Co-expression	Innocenti-Brown-2011
GMFB	TWF1	0.0128967	Co-expression	Innocenti-Brown-2011
SPTSSA	COMMD8	0.0193433	Co-expression	Innocenti-Brown-2011
RAB11FIP2	ZBTB6	0.0162519	Co-expression	Innocenti-Brown-2011
CLEC2B	AP1S2	0.00970918	Co-expression	Innocenti-Brown-2011
ADM	CLEC2B	0.00564361	Co-expression	Innocenti-Brown-2011
TMX1	ZBTB41	0.0140991	Co-expression	Innocenti-Brown-2011
PNISR	ZNF117	0.00818975	Co-expression	Innocenti-Brown-2011
PPP1R12A	CLEC2B	0.00916473	Co-expression	Innocenti-Brown-2011
TIMM9	U2SURP	0.00920369	Co-expression	Innocenti-Brown-2011
SRSF11	U2SURP	0.00873059	Co-expression	Innocenti-Brown-2011
ARMT1	PCGF5	0.00599611	Co-expression	Innocenti-Brown-2011
ARMT1	TMEM106B	0.00749006	Co-expression	Innocenti-Brown-2011
ARMT1	EIF1AX	0.00631848	Co-expression	Innocenti-Brown-2011
LYSMD2	AEBP2	0.0232488	Co-expression	Innocenti-Brown-2011
TOP2B	AEBP2	0.0191394	Co-expression	Innocenti-Brown-2011
TOP2B	PSIP1	0.0206469	Co-expression	Innocenti-Brown-2011
TOP2B	U2SURP	0.0156364	Co-expression	Innocenti-Brown-2011
TOP2B	LYSMD2	0.0225816	Co-expression	Innocenti-Brown-2011
NSMCE4A	ARMT1	0.00782067	Co-expression	Innocenti-Brown-2011
WASHC4	COMMD8	0.0164701	Co-expression	Innocenti-Brown-2011
WASHC4	SPTSSA	0.0218266	Co-expression	Innocenti-Brown-2011
WASHC4	ZBTB6	0.0196514	Co-expression	Innocenti-Brown-2011
WASHC4	RAB11FIP2	0.0246255	Co-expression	Innocenti-Brown-2011
ARL1	TMED7	0.0165936	Co-expression	Innocenti-Brown-2011
SH2D1A	KLRF1	0.0161489	Co-expression	Innocenti-Brown-2011
SH2D1A	KLRC4	0.0168453	Co-expression	Innocenti-Brown-2011
SH2D1A	MYBL1	0.0198909	Co-expression	Innocenti-Brown-2011
SH2D1A	TRAT1	0.0194885	Co-expression	Innocenti-Brown-2011
TWF1	SMC5	0.0133556	Co-expression	Wang-Maris-2006
TWF1	PKN2	0.0103688	Co-expression	Wang-Maris-2006
EIF1AX	PKN2	0.0121053	Co-expression	Wang-Maris-2006
SPTSSA	GMFB	0.0260326	Co-expression	Wang-Maris-2006
NEK7	TWF1	0.018074	Co-expression	Wang-Maris-2006
TMX1	SPTSSA	0.0160971	Co-expression	Wang-Maris-2006
TMEM123	TMX1	0.0138672	Co-expression	Wang-Maris-2006
PNISR	PSIP1	0.00687677	Co-expression	Wang-Maris-2006
U2SURP	PSIP1	0.0134116	Co-expression	Wang-Maris-2006
U2SURP	PNISR	0.00786902	Co-expression	Wang-Maris-2006
PPP1R12A	PNISR	0.00720663	Co-expression	Wang-Maris-2006
CD164	TMED5	0.0166674	Co-expression	Wang-Maris-2006
CD164	NEK7	0.0123504	Co-expression	Wang-Maris-2006
CD164	NUCB2	0.0110852	Co-expression	Wang-Maris-2006
SRSF11	TWF1	0.012612	Co-expression	Wang-Maris-2006
SRSF11	PNISR	0.00721082	Co-expression	Wang-Maris-2006
SRSF11	PPP1R12A	0.0107461	Co-expression	Wang-Maris-2006
TOP2B	U2SURP	0.0172099	Co-expression	Wang-Maris-2006
WASHC4	TWF1	0.0195333	Co-expression	Wang-Maris-2006
WASHC4	NEK7	0.0152301	Co-expression	Wang-Maris-2006
WASHC4	PPP1R12A	0.0149482	Co-expression	Wang-Maris-2006
WASHC4	CD164	0.0101442	Co-expression	Wang-Maris-2006
WASHC4	SRSF11	0.00987053	Co-expression	Wang-Maris-2006
ARL1	TMED5	0.0138585	Co-expression	Wang-Maris-2006
ARL1	CLEC2B	0.00491552	Co-expression	Wang-Maris-2006
ARL1	NEK7	0.0121369	Co-expression	Wang-Maris-2006
ARL1	NUCB2	0.0119923	Co-expression	Wang-Maris-2006
ARL1	CD164	0.00973638	Co-expression	Wang-Maris-2006
SH2D1A	TRAT1	0.0261275	Co-expression	Wang-Maris-2006
TM9SF3	TMED7	0.00641895	Co-expression	Chen-Brown-2002
TWF1	TMED7	0.00684319	Co-expression	Chen-Brown-2002
GMFB	TWF1	0.0119648	Co-expression	Chen-Brown-2002
RAB11FIP2	ZRANB2	0.0113072	Co-expression	Chen-Brown-2002
RAB11FIP2	PPP1CB	0.0168327	Co-expression	Chen-Brown-2002
ADM	CLEC2B	0.0122466	Co-expression	Chen-Brown-2002
TMX1	TWF1	0.0104802	Co-expression	Chen-Brown-2002
PNISR	ZRANB2	0.0105848	Co-expression	Chen-Brown-2002
U2SURP	ZRANB2	0.00572763	Co-expression	Chen-Brown-2002
CD164	AP1S2	0.0177267	Co-expression	Chen-Brown-2002
SRSF11	ZRANB2	0.0145685	Co-expression	Chen-Brown-2002
SRSF11	SMC5	0.0133921	Co-expression	Chen-Brown-2002
SRSF11	PNISR	0.0123264	Co-expression	Chen-Brown-2002
TOP2B	PPP1CB	0.0228587	Co-expression	Chen-Brown-2002
WASHC4	SPTSSA	0.0158795	Co-expression	Chen-Brown-2002
ARL1	NUCB2	0.0172612	Co-expression	Chen-Brown-2002
KLRC4	KLRF1	0.0188044	Co-expression	Roth-Zlotnik-2006
LYSMD3	AEBP2	0.00967783	Co-expression	Roth-Zlotnik-2006
PIP4P2	TMEM106B	0.0102604	Co-expression	Roth-Zlotnik-2006
ZBTB41	TMEM106B	0.0143052	Co-expression	Roth-Zlotnik-2006
ZBTB41	PIP4P2	0.00644415	Co-expression	Roth-Zlotnik-2006
C21orf91	PCGF5	0.0110047	Co-expression	Roth-Zlotnik-2006
OTUD6B	TMEM106B	0.0126423	Co-expression	Roth-Zlotnik-2006
PSIP1	ZBTB41	0.0131063	Co-expression	Roth-Zlotnik-2006
AP1S2	PIP4P2	0.00997786	Co-expression	Roth-Zlotnik-2006
PNISR	ZRANB2	0.0145893	Co-expression	Roth-Zlotnik-2006
PNISR	SMC5	0.00970206	Co-expression	Roth-Zlotnik-2006
U2SURP	ZRANB2	0.0248477	Co-expression	Roth-Zlotnik-2006
U2SURP	SMC5	0.0186118	Co-expression	Roth-Zlotnik-2006
PPP1R12A	AEBP2	0.0169738	Co-expression	Roth-Zlotnik-2006
PPP1R12A	MIER1	0.0126817	Co-expression	Roth-Zlotnik-2006
CD164	TMX1	0.0134042	Co-expression	Roth-Zlotnik-2006
CD164	TMEM123	0.0143069	Co-expression	Roth-Zlotnik-2006
SRSF11	ZRANB2	0.0326816	Co-expression	Roth-Zlotnik-2006
SRSF11	PNISR	0.0154153	Co-expression	Roth-Zlotnik-2006
SRSF11	U2SURP	0.0269715	Co-expression	Roth-Zlotnik-2006
ARMT1	LYSMD3	0.00673121	Co-expression	Roth-Zlotnik-2006
ESD	LYSMD3	0.00929605	Co-expression	Roth-Zlotnik-2006
TOP2B	LIN7C	0.00693448	Co-expression	Roth-Zlotnik-2006
TOP2B	PSIP1	0.00999858	Co-expression	Roth-Zlotnik-2006
TOP2B	ZBTB6	0.00567663	Co-expression	Roth-Zlotnik-2006
WASHC4	TRMT13	0.00757972	Co-expression	Roth-Zlotnik-2006
ARL1	LYSMD3	0.00827312	Co-expression	Roth-Zlotnik-2006
AP1S2	C21orf91	0.0207649	Co-expression	Rosenwald-Staudt-2001
AP1S2	PPP1CB	0.0204249	Co-expression	Rosenwald-Staudt-2001
EIF1AX	PPP1CB	0.0151125	Co-expression	Rosenwald-Staudt-2001
PRKACB	SPTSSA	0.00769362	Co-expression	Rosenwald-Staudt-2001
CD164	SMC5	0.00853426	Co-expression	Rosenwald-Staudt-2001
TOP2B	EIF1AX	0.0147502	Co-expression	Rosenwald-Staudt-2001
TOP2B	PPP1R12A	0.0225928	Co-expression	Rosenwald-Staudt-2001
AP1S2	MYBL1	0.0211031	Co-expression	Burington-Shaughnessy-2008
RAB11FIP2	TRAT1	0.0235185	Co-expression	Burington-Shaughnessy-2008
TMX1	GMFB	0.0136375	Co-expression	Burington-Shaughnessy-2008
TMEM123	TRAT1	0.0104177	Co-expression	Burington-Shaughnessy-2008
PNISR	SMC5	0.00877204	Co-expression	Burington-Shaughnessy-2008
PRKACB	TMED5	0.00938948	Co-expression	Burington-Shaughnessy-2008
NUCB2	TMED5	0.00555751	Co-expression	Burington-Shaughnessy-2008
NUCB2	SPTSSA	0.00907099	Co-expression	Burington-Shaughnessy-2008
PPP1R12A	NEK7	0.00684823	Co-expression	Burington-Shaughnessy-2008
CD164	TMX1	0.00755269	Co-expression	Burington-Shaughnessy-2008
CD164	PNISR	0.00821486	Co-expression	Burington-Shaughnessy-2008
SRSF11	EIF1AX	0.0144149	Co-expression	Burington-Shaughnessy-2008
ESD	TRAT1	0.0173185	Co-expression	Burington-Shaughnessy-2008
ESD	RAB11FIP2	0.0153214	Co-expression	Burington-Shaughnessy-2008
ESD	TMEM123	0.010895	Co-expression	Burington-Shaughnessy-2008
TOP2B	ZNF92	0.0209344	Co-expression	Burington-Shaughnessy-2008
TOP2B	ZBTB6	0.0133316	Co-expression	Burington-Shaughnessy-2008
TOP2B	GABPA	0.02025	Co-expression	Burington-Shaughnessy-2008
WASHC4	CD164	0.0121643	Co-expression	Burington-Shaughnessy-2008
WASHC4	SRSF11	0.0149277	Co-expression	Burington-Shaughnessy-2008
ARL1	TMED5	0.0049549	Co-expression	Burington-Shaughnessy-2008
ARL1	PPP1CB	0.00659951	Co-expression	Burington-Shaughnessy-2008
ARL1	PRKACB	0.00470077	Co-expression	Burington-Shaughnessy-2008
ARL1	NUCB2	0.00368996	Co-expression	Burington-Shaughnessy-2008
ARL1	CD164	0.00411753	Co-expression	Burington-Shaughnessy-2008
ARL1	WASHC4	0.00569842	Co-expression	Burington-Shaughnessy-2008
TMEM106C	SPTSSA	0.0150619	Co-expression	Burington-Shaughnessy-2008
OTUD6B	TMED7	0.0156739	Co-expression	Jiang-de Kok-2017
TWF1	MIER1	0.023014	Co-expression	Jiang-de Kok-2017
AP1S2	SAMD9	0.0100189	Co-expression	Jiang-de Kok-2017
SPTSSA	LYSMD3	0.0187593	Co-expression	Jiang-de Kok-2017
TMEM123	PCGF5	0.021312	Co-expression	Jiang-de Kok-2017
NUCB2	LYSMD3	0.0153623	Co-expression	Jiang-de Kok-2017
ARMT1	PRKACB	0.00666982	Co-expression	Jiang-de Kok-2017
ESD	TMEM106B	0.0206179	Co-expression	Jiang-de Kok-2017
TOP2B	SAMD9	0.00984185	Co-expression	Jiang-de Kok-2017
NSMCE4A	AP1S2	0.00985251	Co-expression	Jiang-de Kok-2017
WASHC4	OTUD6B	0.0197408	Co-expression	Jiang-de Kok-2017
ARL1	TMED7	0.0204384	Co-expression	Jiang-de Kok-2017
ARL1	NUCB2	0.0172912	Co-expression	Jiang-de Kok-2017
ZNF117	TWF1	0.00570494	Co-expression	Bild-Nevins-2006 B
PPP1CB	ZNF117	0.00748457	Co-expression	Bild-Nevins-2006 B
EIF1AX	PKN2	0.0129171	Co-expression	Bild-Nevins-2006 B
ZBTB6	PKN2	0.0125069	Co-expression	Bild-Nevins-2006 B
NEK7	TWF1	0.00467601	Co-expression	Bild-Nevins-2006 B
NEK7	PPP1CB	0.00652642	Co-expression	Bild-Nevins-2006 B
TMX1	GMFB	0.013041	Co-expression	Bild-Nevins-2006 B
PNISR	SMC5	0.00447505	Co-expression	Bild-Nevins-2006 B
PNISR	PPP1CB	0.00668046	Co-expression	Bild-Nevins-2006 B
U2SURP	PNISR	0.0075613	Co-expression	Bild-Nevins-2006 B
NUCB2	PRKACB	0.0133663	Co-expression	Bild-Nevins-2006 B
PPP1R12A	SMC5	0.00673589	Co-expression	Bild-Nevins-2006 B
PPP1R12A	AP1S2	0.00841639	Co-expression	Bild-Nevins-2006 B
PPP1R12A	RAB11FIP2	0.0131498	Co-expression	Bild-Nevins-2006 B
PPP1R12A	PNISR	0.00607938	Co-expression	Bild-Nevins-2006 B
SRSF11	SMC5	0.00470442	Co-expression	Bild-Nevins-2006 B
SRSF11	EIF1AX	0.00966339	Co-expression	Bild-Nevins-2006 B
SRSF11	PNISR	0.00433437	Co-expression	Bild-Nevins-2006 B
ESD	SMC5	0.00871308	Co-expression	Bild-Nevins-2006 B
ESD	SRSF11	0.00863991	Co-expression	Bild-Nevins-2006 B
WASHC4	AP1S2	0.0134292	Co-expression	Bild-Nevins-2006 B
ARL1	TMED5	0.00782402	Co-expression	Bild-Nevins-2006 B
ARL1	TWF1	0.00664459	Co-expression	Bild-Nevins-2006 B
ARL1	CD164	0.00956518	Co-expression	Bild-Nevins-2006 B
SH2D1A	TRAT1	0.0235878	Co-expression	Bild-Nevins-2006 B
TWF1	PKN2	0.00737751	Co-expression	Perou-Botstein-2000
EIF1AX	AP1S2	0.0145108	Co-expression	Perou-Botstein-2000
TMEM123	PPP1CB	0.0163241	Co-expression	Perou-Botstein-2000
PPP1R12A	GABPA	0.0114906	Co-expression	Perou-Botstein-2000
SRSF11	PKN2	0.00884674	Co-expression	Perou-Botstein-2000
SRSF11	GABPA	0.0146452	Co-expression	Perou-Botstein-2000
SRSF11	CD164	0.0166436	Co-expression	Perou-Botstein-2000
TOP2B	TRMT13	0.0162467	Co-expression	Perou-Botstein-2000
C21orf91	MIER1	0.0225986	Co-expression	Mallon-McKay-2013
ZNF117	ZNF92	0.0123645	Co-expression	Mallon-McKay-2013
CLEC2B	SAMD9	0.0140638	Co-expression	Mallon-McKay-2013
GABPA	MIER1	0.0104152	Co-expression	Mallon-McKay-2013
TMX1	OTUD6B	0.0178982	Co-expression	Mallon-McKay-2013
SPTSSB	KLRC4	0.00518039	Co-expression	Mallon-McKay-2013
U2SURP	PNISR	0.0271225	Co-expression	Mallon-McKay-2013
PPP1R12A	GABPA	0.0105722	Co-expression	Mallon-McKay-2013
CD164	TMED7	0.0107424	Co-expression	Mallon-McKay-2013
SRSF11	ZBTB6	0.00614483	Co-expression	Mallon-McKay-2013
ARMT1	GMFB	0.0208199	Co-expression	Mallon-McKay-2013
LYSMD2	CLEC2B	0.00761714	Co-expression	Mallon-McKay-2013
TOP2B	AP1S2	0.00698524	Co-expression	Mallon-McKay-2013
TOP2B	U2SURP	0.00715103	Co-expression	Mallon-McKay-2013
TOP2B	PPP1R12A	0.00720221	Co-expression	Mallon-McKay-2013
NSMCE4A	PNISR	0.0124161	Co-expression	Mallon-McKay-2013
WASHC4	TOP2B	0.00754185	Co-expression	Mallon-McKay-2013
ARL1	TMED7	0.0115461	Co-expression	Mallon-McKay-2013
TMEM106C	KLRC4	0.00479996	Co-expression	Mallon-McKay-2013
TMEM106C	TWF1	0.0170141	Co-expression	Mallon-McKay-2013
SH2D1A	TRAT1	0.0139832	Co-expression	Mallon-McKay-2013
EIF1AX	COMMD8	0.0173635	Co-expression	Wang-Cheung-2015
ZBTB6	PPP1CB	0.0125078	Co-expression	Wang-Cheung-2015
TMEM123	SMC5	0.00484648	Co-expression	Wang-Cheung-2015
TMEM123	PPP1CB	0.00372578	Co-expression	Wang-Cheung-2015
TMEM123	ZBTB6	0.00255229	Co-expression	Wang-Cheung-2015
PRKACB	TMEM123	0.00545103	Co-expression	Wang-Cheung-2015
U2SURP	TM9SF3	0.0142354	Co-expression	Wang-Cheung-2015
PPP1R12A	NEK7	0.0135965	Co-expression	Wang-Cheung-2015
TIMM9	TRMT13	0.00922228	Co-expression	Wang-Cheung-2015
TIMM9	TMEM123	0.00208657	Co-expression	Wang-Cheung-2015
CD164	TMEM123	0.00520694	Co-expression	Wang-Cheung-2015
ARMT1	TM9SF3	0.00757858	Co-expression	Wang-Cheung-2015
ARMT1	TMEM123	0.00157303	Co-expression	Wang-Cheung-2015
ARMT1	PRKACB	0.00865452	Co-expression	Wang-Cheung-2015
ARMT1	U2SURP	0.00536936	Co-expression	Wang-Cheung-2015
ARMT1	CD164	0.0093514	Co-expression	Wang-Cheung-2015
TOP2B	TMEM123	0.00393376	Co-expression	Wang-Cheung-2015
TOP2B	ARMT1	0.00604475	Co-expression	Wang-Cheung-2015
SH2D1A	KLRF1	0.0148884	Co-expression	Wang-Cheung-2015
COMMD8	LIN7C	0.0184573	Co-expression	Dobbin-Giordano-2005
MYBL1	TM9SF3	0.0084581	Co-expression	Dobbin-Giordano-2005
SMC5	TM9SF3	0.0188819	Co-expression	Dobbin-Giordano-2005
PPP1CB	TRMT13	0.0110722	Co-expression	Dobbin-Giordano-2005
U2SURP	TM9SF3	0.0104373	Co-expression	Dobbin-Giordano-2005
U2SURP	MYBL1	0.00678084	Co-expression	Dobbin-Giordano-2005
U2SURP	SMC5	0.0115569	Co-expression	Dobbin-Giordano-2005
NUCB2	TMEM106B	0.0155583	Co-expression	Dobbin-Giordano-2005
TIMM9	LIN7C	0.0171524	Co-expression	Dobbin-Giordano-2005
SRSF11	TRMT13	0.0116731	Co-expression	Dobbin-Giordano-2005
SRSF11	PNISR	0.0187509	Co-expression	Dobbin-Giordano-2005
TOP2B	SRSF11	0.0100754	Co-expression	Dobbin-Giordano-2005
ARL1	NUCB2	0.0224118	Co-expression	Dobbin-Giordano-2005
TMEM106C	TWF1	0.0157943	Co-expression	Dobbin-Giordano-2005
SH2D1A	TRAT1	0.0261611	Co-expression	Dobbin-Giordano-2005
MYBL1	TMEM106B	0.0104706	Co-expression	Perou-Botstein-1999
PPP1R12A	TRMT13	0.0120285	Co-expression	Perou-Botstein-1999
MYBL1	MIER1	0.00580894	Co-expression	Boldrick-Relman-2002
PPP1CB	MYBL1	0.00443134	Co-expression	Boldrick-Relman-2002
PRKACB	TMEM106B	0.00684597	Co-expression	Boldrick-Relman-2002
PRKACB	MYBL1	0.00252658	Co-expression	Boldrick-Relman-2002
TOP2B	CLEC2B	0.00828998	Co-expression	Boldrick-Relman-2002
NSMCE4A	PNISR	0.00849427	Co-expression	Boldrick-Relman-2002
WASHC4	SAMD9	0.0130023	Co-expression	Boldrick-Relman-2002
PSIP1	SMC5	0.00886153	Co-expression	Rieger-Chu-2004
EIF1AX	AP1S2	0.019914	Co-expression	Rieger-Chu-2004
PNISR	SMC5	0.00494786	Co-expression	Rieger-Chu-2004
PPP1R12A	NEK7	0.00693529	Co-expression	Rieger-Chu-2004
CD164	TMED5	0.0100958	Co-expression	Rieger-Chu-2004
CD164	ZNF117	0.00794525	Co-expression	Rieger-Chu-2004
CD164	TMX1	0.00934029	Co-expression	Rieger-Chu-2004
SRSF11	SMC5	0.00580585	Co-expression	Rieger-Chu-2004
SRSF11	TWF1	0.00973534	Co-expression	Rieger-Chu-2004
SRSF11	PPP1CB	0.00865046	Co-expression	Rieger-Chu-2004
SRSF11	PPP1R12A	0.00502649	Co-expression	Rieger-Chu-2004
SRSF11	CD164	0.00582521	Co-expression	Rieger-Chu-2004
ESD	AP1S2	0.0112473	Co-expression	Rieger-Chu-2004
TOP2B	PSIP1	0.0121857	Co-expression	Rieger-Chu-2004
TOP2B	NEK7	0.00933232	Co-expression	Rieger-Chu-2004
TOP2B	PNISR	0.00641991	Co-expression	Rieger-Chu-2004
ARL1	TWF1	0.0134199	Co-expression	Rieger-Chu-2004
ARL1	PPP1CB	0.0121219	Co-expression	Rieger-Chu-2004
SPTSSA	TRMT13	0.0121414	Co-expression	Ross-Perou-2001
PPP1R12A	GMFB	0.0148073	Co-expression	Ross-Perou-2001
SRSF11	GABPA	0.0148315	Co-expression	Ross-Perou-2001
TOP2B	EIF1AX	0.0208238	Co-expression	Ross-Perou-2001
TMEM106B	AEBP2	0.000511928	Genetic Interactions	Lin-Smith-2010
ZBTB41	AEBP2	0.00181295	Genetic Interactions	Lin-Smith-2010
TM9SF3	KLRF1	0.00152936	Genetic Interactions	Lin-Smith-2010
TM9SF3	TMEM106B	0.000647347	Genetic Interactions	Lin-Smith-2010
ZRANB2	PCGF5	0.000504255	Genetic Interactions	Lin-Smith-2010
TRMT13	SAMD9	0.00118321	Genetic Interactions	Lin-Smith-2010
OTUD6B	PCGF5	0.00116091	Genetic Interactions	Lin-Smith-2010
PSIP1	C21orf91	0.000879229	Genetic Interactions	Lin-Smith-2010
PSIP1	ZRANB2	0.000621301	Genetic Interactions	Lin-Smith-2010
PKN2	TMEM106B	0.000534339	Genetic Interactions	Lin-Smith-2010
AP1S2	PCGF5	0.00115954	Genetic Interactions	Lin-Smith-2010
AP1S2	PKN2	0.000783252	Genetic Interactions	Lin-Smith-2010
EIF1AX	PIP4P2	0.00140019	Genetic Interactions	Lin-Smith-2010
EIF1AX	ZRANB2	0.000448388	Genetic Interactions	Lin-Smith-2010
EIF1AX	PKN2	0.000470802	Genetic Interactions	Lin-Smith-2010
EIF1AX	PPP1CB	0.00126734	Genetic Interactions	Lin-Smith-2010
ZBTB6	PSIP1	0.0024778	Genetic Interactions	Lin-Smith-2010
ZBTB6	TRAT1	0.00518338	Genetic Interactions	Lin-Smith-2010
RAB11FIP2	PIP4P2	0.0010247	Genetic Interactions	Lin-Smith-2010
RAB11FIP2	C21orf91	0.000464367	Genetic Interactions	Lin-Smith-2010
RAB11FIP2	ZRANB2	0.000328142	Genetic Interactions	Lin-Smith-2010
RAB11FIP2	TMED5	0.000527762	Genetic Interactions	Lin-Smith-2010
RAB11FIP2	GMFB	0.00153501	Genetic Interactions	Lin-Smith-2010
ALPL	OTUD6B	0.00181171	Genetic Interactions	Lin-Smith-2010
ADM	COMMD8	0.0036081	Genetic Interactions	Lin-Smith-2010
NEK7	AEBP2	0.000411879	Genetic Interactions	Lin-Smith-2010
NEK7	C21orf91	0.00057942	Genetic Interactions	Lin-Smith-2010
NEK7	TMED5	0.000658521	Genetic Interactions	Lin-Smith-2010
TMEM123	ZRANB2	0.000603412	Genetic Interactions	Lin-Smith-2010
TMEM123	TRAT1	0.00241758	Genetic Interactions	Lin-Smith-2010
PRKACB	SAMD9	0.0015391	Genetic Interactions	Lin-Smith-2010
PRKACB	AP1S2	0.00184193	Genetic Interactions	Lin-Smith-2010
PRKACB	CLEC2B	0.0016112	Genetic Interactions	Lin-Smith-2010
PRKACB	ALPL	0.00194311	Genetic Interactions	Lin-Smith-2010
PRKACB	TMEM123	0.00148994	Genetic Interactions	Lin-Smith-2010
PIP4P1	NEK7	0.0022423	Genetic Interactions	Lin-Smith-2010
SPTSSB	PCGF5	0.000659546	Genetic Interactions	Lin-Smith-2010
SPTSSB	TMED5	0.000682422	Genetic Interactions	Lin-Smith-2010
SPTSSB	PKN2	0.000445514	Genetic Interactions	Lin-Smith-2010
SPTSSB	PPP1CB	0.00119926	Genetic Interactions	Lin-Smith-2010
SPTSSB	SPTSSA	0.00111131	Genetic Interactions	Lin-Smith-2010
SPTSSB	ALPL	0.00102929	Genetic Interactions	Lin-Smith-2010
NUCB2	AEBP2	0.000746928	Genetic Interactions	Lin-Smith-2010
NUCB2	COMMD8	0.00222451	Genetic Interactions	Lin-Smith-2010
PPP1R12A	C21orf91	0.00068599	Genetic Interactions	Lin-Smith-2010
PPP1R12A	EIF1AX	0.000670022	Genetic Interactions	Lin-Smith-2010
PPP1R12A	CLEC2B	0.000975054	Genetic Interactions	Lin-Smith-2010
PPP1R12A	NEK7	0.000611827	Genetic Interactions	Lin-Smith-2010
CD164	C21orf91	0.00111342	Genetic Interactions	Lin-Smith-2010
CD164	NEK7	0.000993053	Genetic Interactions	Lin-Smith-2010
SRSF11	PIP4P2	0.0012983	Genetic Interactions	Lin-Smith-2010
SRSF11	TM9SF3	0.000528865	Genetic Interactions	Lin-Smith-2010
SRSF11	EIF1AX	0.000574659	Genetic Interactions	Lin-Smith-2010
SRSF11	RAB11FIP2	0.00042055	Genetic Interactions	Lin-Smith-2010
SRSF11	NUCB2	0.00095161	Genetic Interactions	Lin-Smith-2010
TMEM106A	AEBP2	0.00102381	Genetic Interactions	Lin-Smith-2010
TMEM106A	TM9SF3	0.00129464	Genetic Interactions	Lin-Smith-2010
TMEM106A	ALPL	0.00246889	Genetic Interactions	Lin-Smith-2010
ARMT1	EIF1AX	0.00197307	Genetic Interactions	Lin-Smith-2010
ARMT1	SPTSSB	0.00186709	Genetic Interactions	Lin-Smith-2010
ESD	PCGF5	0.00089374	Genetic Interactions	Lin-Smith-2010
ESD	PIP4P2	0.00179547	Genetic Interactions	Lin-Smith-2010
ESD	TM9SF3	0.000731389	Genetic Interactions	Lin-Smith-2010
ESD	OTUD6B	0.0013237	Genetic Interactions	Lin-Smith-2010
ESD	PKN2	0.000603709	Genetic Interactions	Lin-Smith-2010
ESD	AP1S2	0.00132214	Genetic Interactions	Lin-Smith-2010
LYSMD2	TM9SF3	0.00241401	Genetic Interactions	Lin-Smith-2010
TOP2B	AP1S2	0.00430976	Genetic Interactions	Lin-Smith-2010
WASHC4	RAB11FIP2	0.000616141	Genetic Interactions	Lin-Smith-2010
ARL1	LIN7C	0.00179404	Genetic Interactions	Lin-Smith-2010
ARL1	C21orf91	0.000992003	Genetic Interactions	Lin-Smith-2010
ARL1	CLEC2B	0.00141002	Genetic Interactions	Lin-Smith-2010
ARL1	ALPL	0.00170049	Genetic Interactions	Lin-Smith-2010
ARL1	CD164	0.00170017	Genetic Interactions	Lin-Smith-2010
SH2D1A	PKN2	0.000657482	Genetic Interactions	Lin-Smith-2010
SH2D1A	RAB11FIP2	0.000633401	Genetic Interactions	Lin-Smith-2010
PRKACB	PPP1CB	0.0297449	Physical Interactions	Vastrik-Stein-2007
PRKACB	RAB11FIP2	0.0565272	Physical Interactions	Vastrik-Stein-2007
MYO5B	RAB11FIP2	0.327208	Physical Interactions	Vastrik-Stein-2007
MYO5B	PRKACB	0.0565272	Physical Interactions	Vastrik-Stein-2007
PPP1R12A	PPP1CB	0.218237	Physical Interactions	Vastrik-Stein-2007
PRKACB	PPP1CB	0.0297449	Physical Interactions	IREF-reactome
PRKACB	RAB11FIP2	0.0565272	Physical Interactions	IREF-reactome
MYO5B	RAB11FIP2	0.327208	Physical Interactions	IREF-reactome
MYO5B	PRKACB	0.0565272	Physical Interactions	IREF-reactome
PPP1R12A	PPP1CB	0.218237	Physical Interactions	IREF-reactome
TMX1	TWF1	0.148576	Predicted	Stuart-Kim-2003
U2SURP	ZRANB2	0.287355	Predicted	Stuart-Kim-2003
NUCB2	TMX1	0.661796	Predicted	Stuart-Kim-2003
TIMM9	AP1S2	0.536778	Predicted	Stuart-Kim-2003
SRSF11	ZRANB2	0.0957033	Predicted	Stuart-Kim-2003
SRSF11	U2SURP	0.092622	Predicted	Stuart-Kim-2003
ARMT1	TWF1	0.256942	Predicted	Stuart-Kim-2003
ESD	ALPL	0.400904	Predicted	Stuart-Kim-2003
NSMCE4A	TRMT13	0.325557	Predicted	Stuart-Kim-2003
ARL1	TMED7	0.0977264	Predicted	Stuart-Kim-2003
KLRC4	KLRF1	0.01284	Shared protein domains	INTERPRO
MYBL1	MIER1	0.0136183	Shared protein domains	INTERPRO
TMED5	TMED7	0.0753512	Shared protein domains	INTERPRO
ZNF117	AEBP2	0.00391078	Shared protein domains	INTERPRO
GMFB	TWF1	0.107099	Shared protein domains	INTERPRO
ZBTB6	ZBTB41	0.0204447	Shared protein domains	INTERPRO
CLEC2B	KLRF1	0.017062	Shared protein domains	INTERPRO
CLEC2B	KLRC4	0.0141428	Shared protein domains	INTERPRO
PRKACB	PKN2	0.0172834	Shared protein domains	INTERPRO
AL391987.2	AL627230.1	1	Shared protein domains	INTERPRO
PIP4P1	PIP4P2	1	Shared protein domains	INTERPRO
SPTSSB	SPTSSA	1	Shared protein domains	INTERPRO
CD164	TMEM123	0.5	Shared protein domains	INTERPRO
SRSF11	U2SURP	0.00390058	Shared protein domains	INTERPRO
TMEM106A	TMEM106B	0.5	Shared protein domains	INTERPRO
LYSMD2	LYSMD3	0.226531	Shared protein domains	INTERPRO
TMEM106C	TMEM106B	0.5	Shared protein domains	INTERPRO
TMEM106C	TMEM106A	0.5	Shared protein domains	INTERPRO
MYBL1	MIER1	0.0278141	Shared protein domains	PFAM
TMED5	TMED7	0.0917208	Shared protein domains	PFAM
GMFB	TWF1	0.111236	Shared protein domains	PFAM
ZBTB6	ZBTB41	0.0227684	Shared protein domains	PFAM
CLEC2B	KLRF1	0.0129436	Shared protein domains	PFAM
NEK7	PKN2	0.00267587	Shared protein domains	PFAM
PRKACB	PKN2	0.00267587	Shared protein domains	PFAM
PRKACB	NEK7	0.00328803	Shared protein domains	PFAM
AL391987.2	AL627230.1	1	Shared protein domains	PFAM
PIP4P1	PIP4P2	1	Shared protein domains	PFAM
SPTSSB	SPTSSA	1	Shared protein domains	PFAM
CD164	TMEM123	0.5	Shared protein domains	PFAM
SRSF11	U2SURP	0.00507657	Shared protein domains	PFAM
TMEM106A	TMEM106B	0.5	Shared protein domains	PFAM
LYSMD2	LYSMD3	0.298537	Shared protein domains	PFAM
TMEM106C	TMEM106B	0.5	Shared protein domains	PFAM
TMEM106C	TMEM106A	0.5	Shared protein domains	PFAM
